# Supplementary material for: Synthesis of core–shell structured TS-1@mesocarbon materials and their applications as a tandem catalyst
Source: Royal Society of Chemistry journal article supplement (doi:10.1039/c2jm31788e), 2012-01-01
Supplement: c2jm31788e.pdf [file c2jm31788e.pdf]

# Electronic Supplementary Information for

## Synthesis of core-shell structured TS-1@mesocarbon material and its application as a tandem catalyst

Honggen Peng, Le Xu, Liyan Zhang, Kun Zhang, Yueming Liu, Peng Wu\*

*Shanghai Key Laboratory of Green Chemistry and Chemical Processes, Department of Chemistry, East China Normal University, North Zhongshan Road 3663, Shanghai 200062, China*

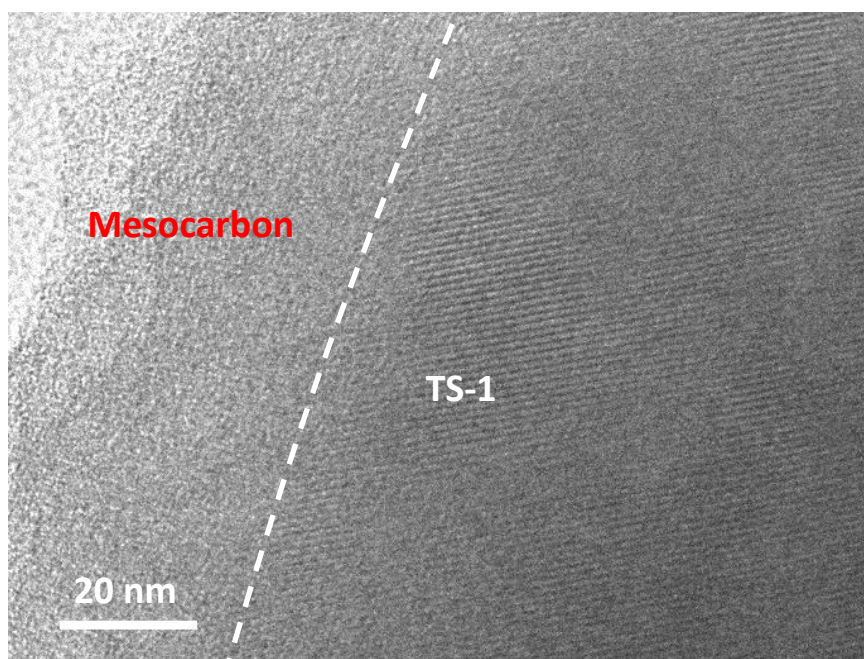

**Fig. S1** High resolution TEM image of TS-1@MC.

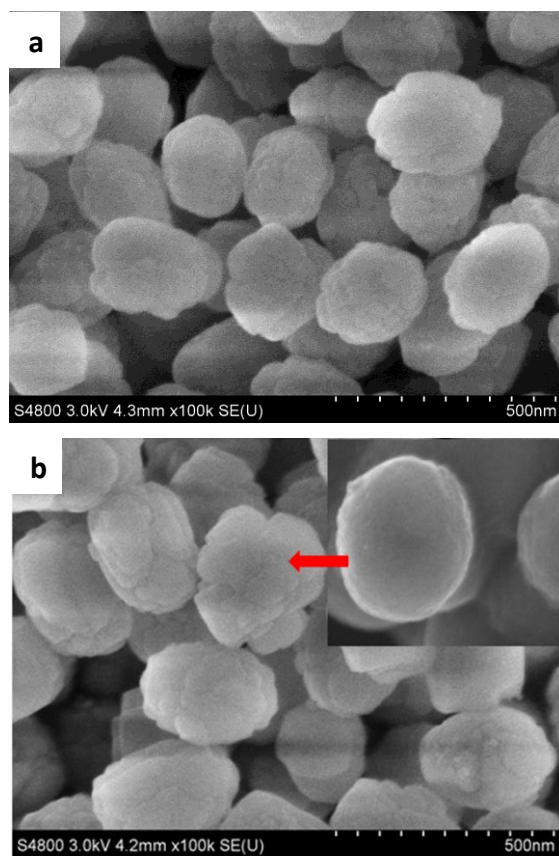

**Fig. S2** SEM images of TS-1 (a) and TS-1@MC-TPAOH after calcination in air at 873 K for 6 h. The insert shows the image of uncalcined TS-1@MC-TPAOH.

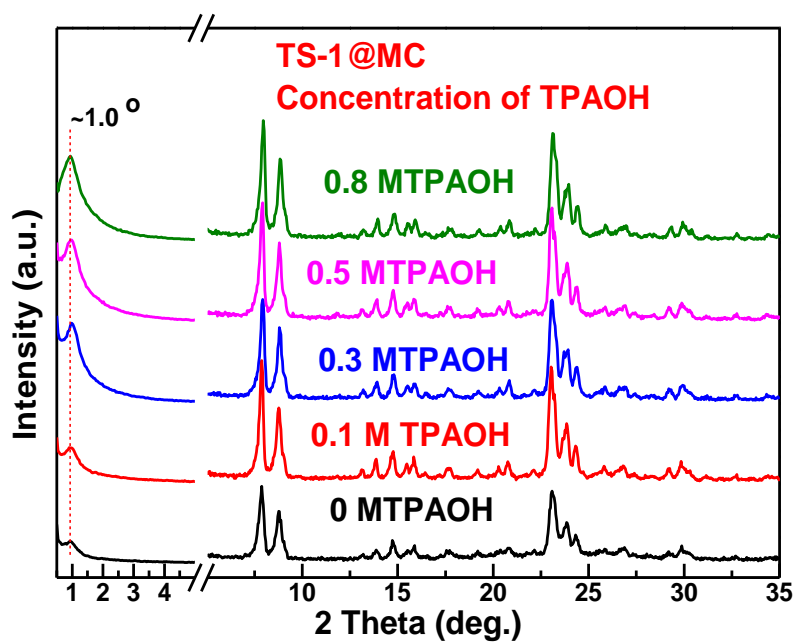

**Fig. S3** XRD patterns of TS-1@MC prepared by etching with TPAOH at different concentrations. Other conditions: 338 K and 4 h.

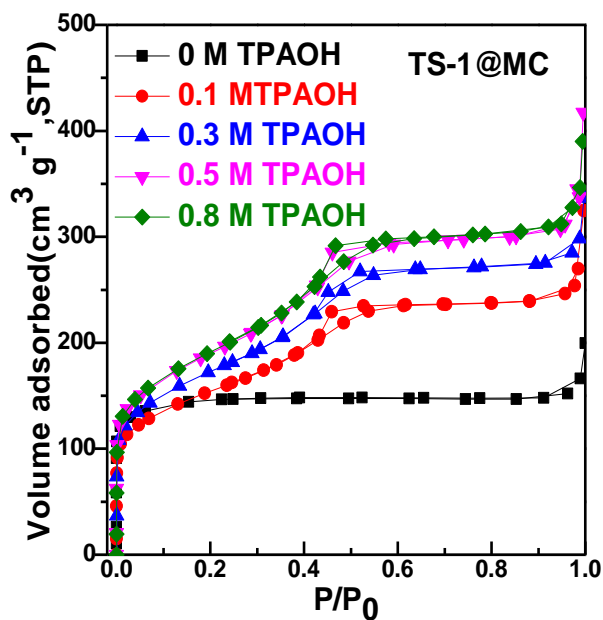

**Fig. S4**  $N_2$  adsorption/desorption isotherms of TS-1@MC prepared by etching with TPAOH at different concentration at 338 K for 4 h. The TPAOH was not removed by calcination in vacuum after TS-1@MS/C etched by TPAOH.

**Table S1** Physicochemical properties of TS-1@MC etched with TPAOH at different concentration <sup>a</sup>

| No. | TPAOH (M) | Yield (wt%) | Carbon content (%) | Si/Ti ratio | S <sub>BET</sub> (m <sup>2</sup> g <sup>-1</sup> ) | S <sub>ext</sub> (m <sup>2</sup> g <sup>-1</sup> ) | V <sub>tot</sub> (cm <sup>3</sup> g <sup>-1</sup> ) | D <sub>meso</sub> (nm) | D <sub>micro</sub> (nm) |
|-----|-----------|-------------|--------------------|-------------|----------------------------------------------------|----------------------------------------------------|-----------------------------------------------------|------------------------|-------------------------|
| 1   | 0         | 100         | 22.0               | 65          | 360                                                | 32.5                                               | 0.259                                               | -                      | 0.56                    |
| 2   | 0.1       | 80.0        | 27.3               | 50          | 533                                                | 227                                                | 0.463                                               | 3.28                   | 0.51                    |
| 3   | 0.3       | 76.0        | 29.6               | 45          | 605                                                | 270                                                | 0.473                                               | 2.94                   | 0.84                    |
| 4   | 0.5       | 71.7        | 29.1               | 39          | 657                                                | 347                                                | 0.561                                               | 2.94                   | 0.51                    |
| 5   | 0.8       | 70.5        | 30.1               | 40          | 661                                                | 379                                                | 0.547                                               | 2.94                   | 0.51                    |

<sup>a</sup> Other conditions: 338 K, 4 h. Yield in grams of solid after treatment per gram of starting material. The TPAOH was not removed by calcination in vacuum after TS-1@MS/C etched by TPAOH.

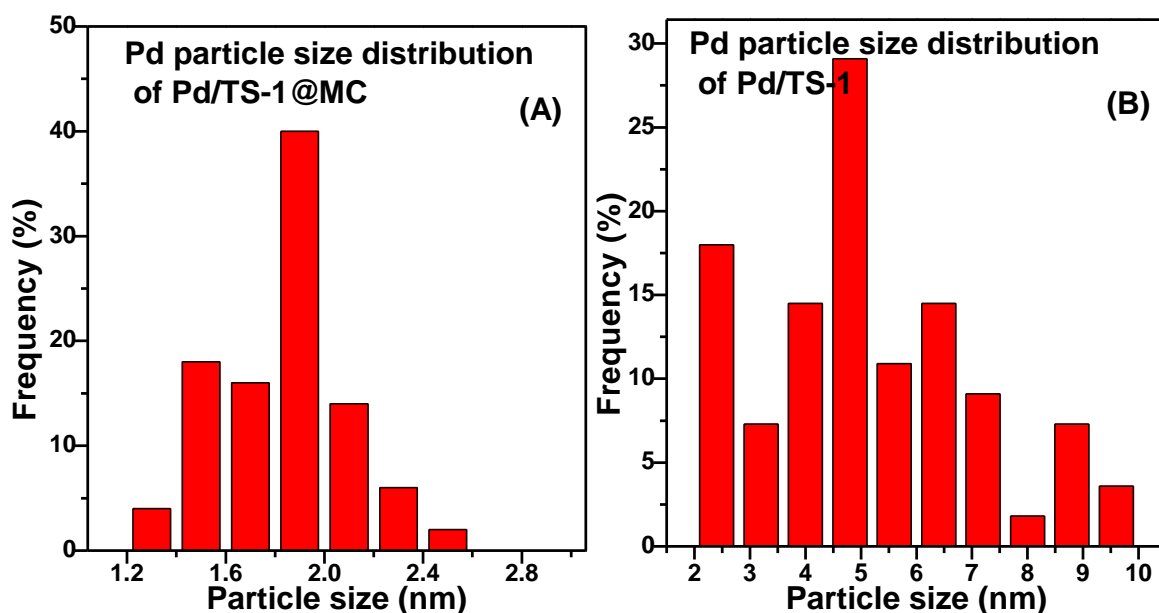

**Fig. S5** Pd particle size distribution of Pd/TS-1@MC (A) and Pd/TS-1 (B).
